# Supplementary material for: Generational differences in mental health trends in the twenty-first century
Source: PubMed Central journal article supplement — Proc Natl Acad Sci U S A. 2023 Nov 27;120(49):e2303781120. doi: 10.1073/pnas.2303781120 (PMC10710089; doi:10.1073/pnas.2303781120), 2023-11-27
Supplement: pnas.2303781120.sapp.pdf [file pnas.2303781120.sapp.pdf]

# PNAS



1

## 2 **Supporting Information for**

### 3 **Generational differences in mental health trends in the twenty-first century**

4 **Ferdi Botha, Richard W Morris, Peter Butterworth and Nick Glozier**

5 **Richard W Morris.**

6 **E-mail: [richard.morris@sydney.edu.au](mailto:richard.morris@sydney.edu.au)**

#### 7 **This PDF file includes:**

- 8 Supporting text
- 9 Figs. S1 to S8
- 10 Table S1
- 11 Legend for Dataset S1
- 12 SI References

#### 13 **Other supporting materials for this manuscript include the following:**

- 14 Dataset S1

## 15 Supporting Information Text

### 16 Sensitivity analyses

17 **Alternate cohort definitions.** The birth cohort definitions reported in the main text were aligned with the calendar decade  
18 (e.g., the 1990s birth cohort included people born between 1990 to 1999, inclusive). We also tested other cohort definitions to  
19 determine whether the reported results generalized and were not specific to this initial choice of cohort definition.

20 We examined four sequential new cohort schemes, in which the starting point for each cohort was defined by birth-years  
21 one year earlier than the previous scheme. Thus the first scheme used a range of years that commenced and ended one year  
22 earlier than the original definition (e.g., the youngest cohort became a “1989:1998” cohort, and the oldest cohort became a  
23 “1939:1948” cohort). The fourth and final scheme used a cohort definition that commenced and ended four years earlier than  
24 the original definition (e.g., the youngest cohort became a “1986:1995” cohort, the oldest cohort became a “1936:1945” cohort).

25 For each alternative cohort scheme, we repeated the main analysis and calculated the difference smooths between each  
26 cohort and the next oldest cohort using the same model as reported in the main text. Figure S1 presents the resulting difference  
27 smooths in a 5-by-5 multipanel figure to allow the reader to compare and contrast the impact of alternative cohort definitions  
28 on the main result.

29 Each difference smooth in Figure S1 represents the mean centred difference between the titular cohort and the next oldest  
30 cohort, as in the main text. For example, the 1990s difference smooth represents the difference between the 1990s cohort and  
31 the 1980s cohort; the 1989:1998 difference smooth represents the difference between the 1989:1998 cohort and the 1979:1988  
32 cohort, and so on. In each column the difference smooth is steepest for the youngest cohort in the top row, and flat or relatively  
33 flat for the oldest cohorts in the bottom row. Thus each column indicates greater (relative) declines in mental health with age  
34 for younger cohorts relative to older cohorts, regardless of cohort definition.

35 Where differences between definitions (columns) do appear, it mostly represents the movement of people in each cohort  
36 shifting to the next (younger) cohort as the cohort definition changes. However this shift does not impact the flattening pattern  
37 occurring within each column, confirming that our specific cohort definition is not driving the primary results of interest.

38 **Period effects.** Period effects refer to variance over time that is common across all age groups and cohorts, due to population-wide  
39 events such as the Global Financial Crisis (GFC) in 2008 or the COVID-19 pandemic that started in 2020. We estimated the  
40 nonlinear effect of period over the complete set of survey years (2000 to 2020) as a smooth term in a model by age-group:

$$y_{it} = \beta_k(\text{age-group}_{it}) + f(\text{year}_{it}) + f_{[k]}(\text{year}_{it}) + \zeta_i + \epsilon_{it}$$
$$\epsilon_{it} \sim N(0, \sigma^2)$$

41 Where  $y_{it}$  is the continuous MHI-5 score for each person  $i$  in each year of the survey  $t = 1 \dots 20$ ;  $\beta_k$  is the mean MHI-5  
42 estimate for each  $k = 1 \dots 6$  age-group, after accounting for variations in trend over year;  $f(\text{year})$  is a smooth function of year  
43 (period effect) and  $f_{[k]}$  are the smooth functions over year for each age-group.

44 The smooth effect of period (after accounting for nonlinear age effects) is shown as a dotted line in the left panel of Figure 1  
45 in the main text. The dotted line in the left panel of Figure 1 (main text) shows a slow decline in average MHI-5 scores from  
46 2007 but which becomes more exaggerated from around 2017. However the trajectory is not the same across all age-groups,  
47 indicated by the deviation of the age-group smooths (colored lines) from the dotted line.

48 We detrended the linear period effect from the main results by including a linear term for period, and estimating the smooth  
49 differences in mental health between adjacent cohorts (Figure S2). The resulting cohort smooths shown in the left panels of  
50 Figure S2 no longer show the common negative trend in mental health over age. However the difference smooths in the right  
51 panels still show the negative interaction is present in younger cohorts relative to older cohorts.

52 **Psychological distress.** K10 scores (psychological distress: where higher scores indicate greater distress) were collected in  
53 alternate years from 2007 to 2019 in HILDA. We modelled the age and cohort effects in the K10 scores in a GAMM model  
54 similar to that described for MHI-5 scores. The corresponding trajectories for each cohort are shown in Figure S3 and confirm  
55 psychological distress was higher for more recent cohorts than earlier cohorts at the same age, consistent with the main results  
56 reported for mental health (MHI-5 scores).

57 **Prevalence of mental illness.** The MHI-5 has good psychometric properties when identifying DSM-V disorders in a community  
58 sample (1) and it has proven useful as a screening tool for depression and anxiety (2). While the MHI-5 is not a diagnostic  
59 instrument, Berwick et al (3) and Ware et al (4) showed that the optimal cut-off for detecting depression or anxiety is 52 or  
60 less, on the 0-100 scale. This has thus become a frequently used MHI-5 cut-off point to identify risk of mental illness (1, 5–9),  
61 and we follow that convention and use the same cut-off to determine whether a person is at risk of mental illness or not.

62 We modelled the prevalence of mental illness for each age-group and cohort in a GAMM model similar to that described for  
63 MHI-5 scores in the main text, with the distributional assumptions updated to reflect the binary outcome. The results are  
64 presented in Figure S4 and confirm the prevalence of mental illness was higher for more recent cohorts than earlier cohorts at  
65 the same age, consistent with the main results for mental health (MHI-5 scores).

66 **Gender differences.** The birth cohort trajectories in mental health (MHI-5 scores) over time were modelled separately for men  
67 and women. The results are shown in Figure S5 and confirm that while women had lower average MHI-5 scores, men and  
68 women had similar trajectory differences between cohorts.

69 **Excluding the top-up sample.** We confirmed the declining mental health trajectories were not due to the addition of new  
70 respondents to the HILDA Survey. To maintain the representativeness of the survey over time, the HILDA Survey added new  
71 respondents in 2011 via a top-up sample. This was also around the same time that declines in mental health can be observed in  
72 Figure 1, left panel of the main text. We conducted an analysis excluding the top-up sample members to confirm the declining  
73 mental health trajectories were not driven by the new respondents in the top-up sample. The results shown in Figure S6 are  
74 consistent with the results reported in the main text.

75 **Social demand effects.** Individuals may conceal poor mental health when surveyed by a unfamiliar interviewer due to unmeasured  
76 social demand characteristics. The HILDA Survey assigns the same interviewer to households over time so this effect can be  
77 ameliorated by excluding the first survey from each person. Note the MHI-5 is part of the self-complete questionnaire (SCQ) so  
78 no interviewer is present and we expect social demand characteristics to be low. The mental health trajectories after excluding  
79 the first interview are shown in Figure S7 and the results confirm that social demand characteristics did not substantially  
80 change the cohort trajectories.

81 **Attrition effects.** We examined the effect of panel attrition (i.e., missingness) on the main results due to concerns that the  
82 probability of attrition from the panel may vary with the experience of mental health. For instance, if people with deteriorating  
83 mental health were more likely to leave the panel, this could produce a bias since people with lower mental health are not likely  
84 to be observed or measured in the results. If that bias varies with age or cohort such that older people or earlier cohorts are  
85 more likely to be missing in the data when their mental health declines, then that could produce a pattern of results consistent  
86 with the results we observed (i.e., a confound).

87 We examined the effect of attrition in two different ways. In the first approach, we modelled the dependency between  
88 mental health and missingness in the following year, including any interactions with cohort. If the dependency between mental  
89 health and subsequent missingness varies by cohort such that older cohorts were more likely to be missing with declines in  
90 mental health, then that could contribute to the different cohort trajectories reported in the main analysis (i.e., a confound).  
91 Thus we test the interaction between mental health and cohort on missingness, and report the marginal effect of MHI-5 score  
92 on probability of missingness for each cohort. To identify the source of the interaction, in a post-estimation procedure we  
93 compared the estimated dependencies ( $\beta$ s) for each cohort with the earlier reference cohort. The post-estimation comparisons  
94 were adjusted for multiple comparisons (Tukey), and standard errors along with p-values are reported.

95 To model the dependency between mental health and attrition in the first approach, we constructed a dummy variable  
96 indicating whether the MHI-5 score was missing the following year, for each individual and entered it into the model as the  
97 outcome ( $y$ ) variable. Note that this indicator cannot be calculated for the final wave used in our analysis (Wave 20), as we  
98 cannot determine whether the MHI-5 score will or will not be missing in the subsequent survey wave. On average, in about 5  
99 percent of person-year observations ( $n = 13,061$ ) the MHI-5 score was missing in the following survey wave. The missingness  
100 dummy was regressed on MHI-5 scores in a multilevel model with random intercepts for person and year dummies to estimate  
101 the total dependency between missingness and mental health. We also included interaction terms between MHI-5 scores and  
102 each birth cohort, and in a post-estimation procedure compared the dependency between mental health and missingness  
103 between adjacent cohorts.

104 The results showed that a model including MHI-5 scores predicted significantly more variance in missingness than a null  
105 model ( $\chi^2 = 163.14$ ,  $p < .001$ ), confirming a dependency existed between mental health and missingness. This is consistent with  
106 previous research showing a small but significant dependency existed (OR = 0.992) (c.f., OR = 0.991, (10)). The dependency  
107 with mental health also interacted with birth cohort ( $\chi^2 = 59.77$ ,  $p < .001$ ), such that missingness was more likely with  
108 decreases in mental health among earlier cohorts (i.e., consistent with a confound). Table S1 shows the odds ratio of missingness  
109 for a decrease in MHI-5 score (c.f. OR column, Table S1), as well as the post-estimation comparison with the prior cohort (c.f.  
110 Difference column, Table S1). The results show the difference between adjacent cohorts was very small (Differences  $< .01$  in  
111 OR units) and mostly non-significant. Only the difference between the 60s and 50s cohort reached statistical significance.

112 In the second approach we re-estimated the smooth differences between cohorts after excluding those people who final  
113 observation was missing (i.e., due to attrition). To do this we identified among the subset of people with missing data any  
114 person who did not return after their most recent missing interview, as a proxy of attrition. We re-conducted the main analysis  
115 of smooth difference trends after excluding the attrition subset. Figure S8 shows that excluding persons who eventually are lost  
116 to attrition did not change the differences between cohorts, and mental health was lower in more recent cohort relative to  
117 earlier cohorts at the same age.

118 Overall the results indicate a dependency between poorer mental health and missingness exists, however it is small and does  
119 not appear to explain the differences between cohort trajectories we observe in the main analysis.

## 120 Results

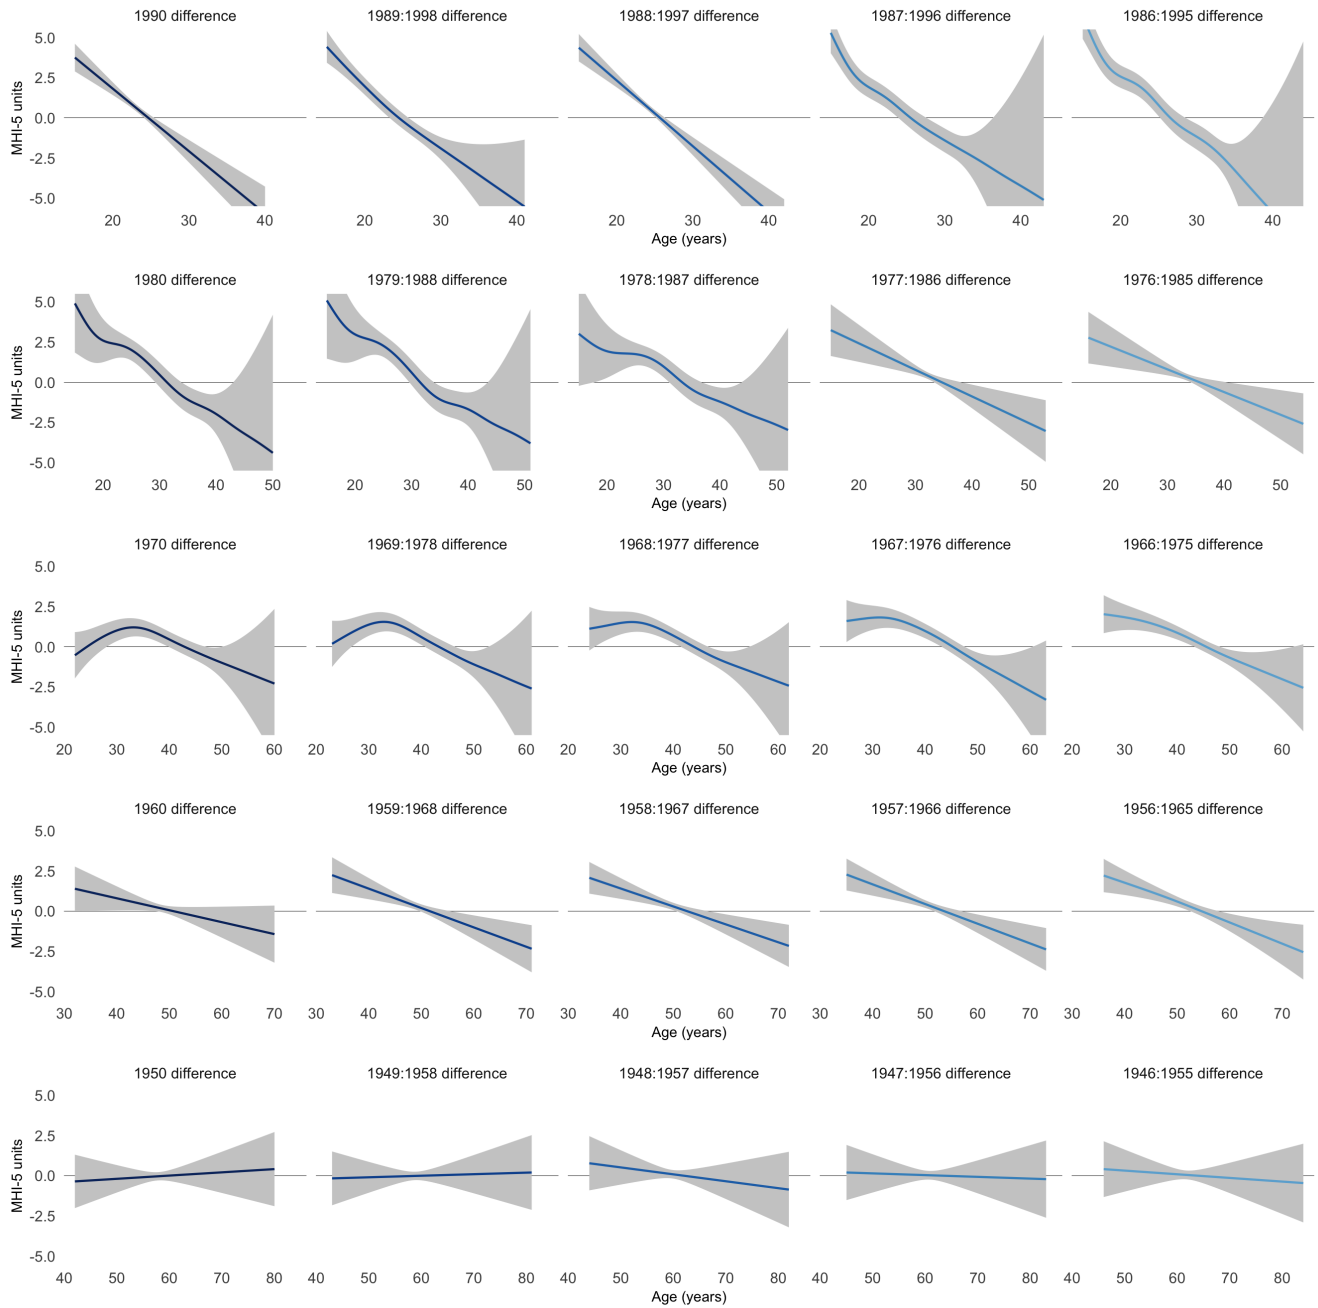

**Fig. S1.** Centered cohort difference smooths (relative to the subsequent older cohort). Cohorts arranged by row (top to bottom from youngest to oldest) and definitions by column (left to right from original to earliest).

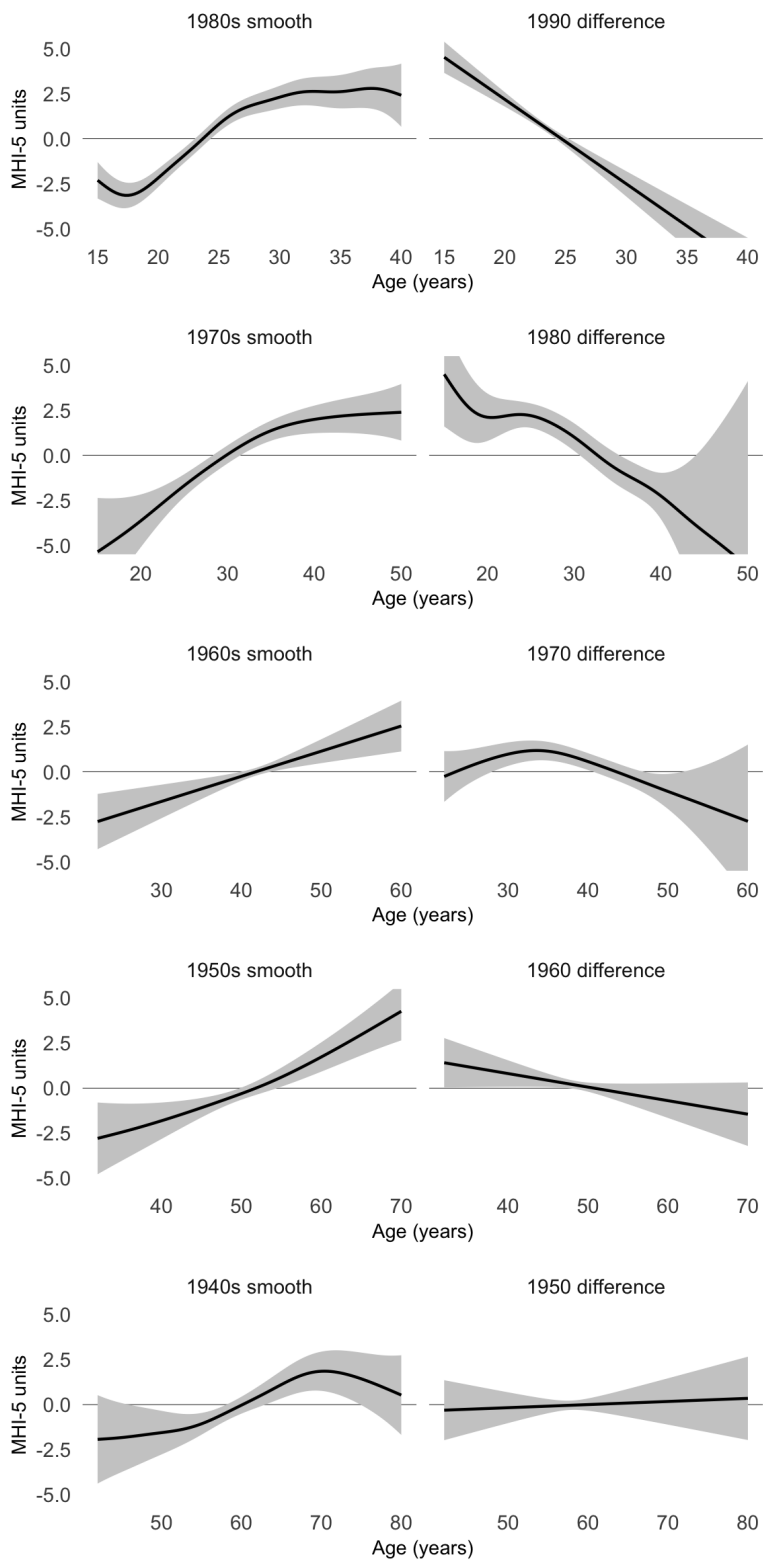

**Fig. S2.** Detrending period effects. Centered cohort trajectories (left) and their difference to the subsequent cohort (right), after adjustment for any linear period effect. Mental health (MHI-5 scores) were lower for later cohorts than earlier cohorts at the same age

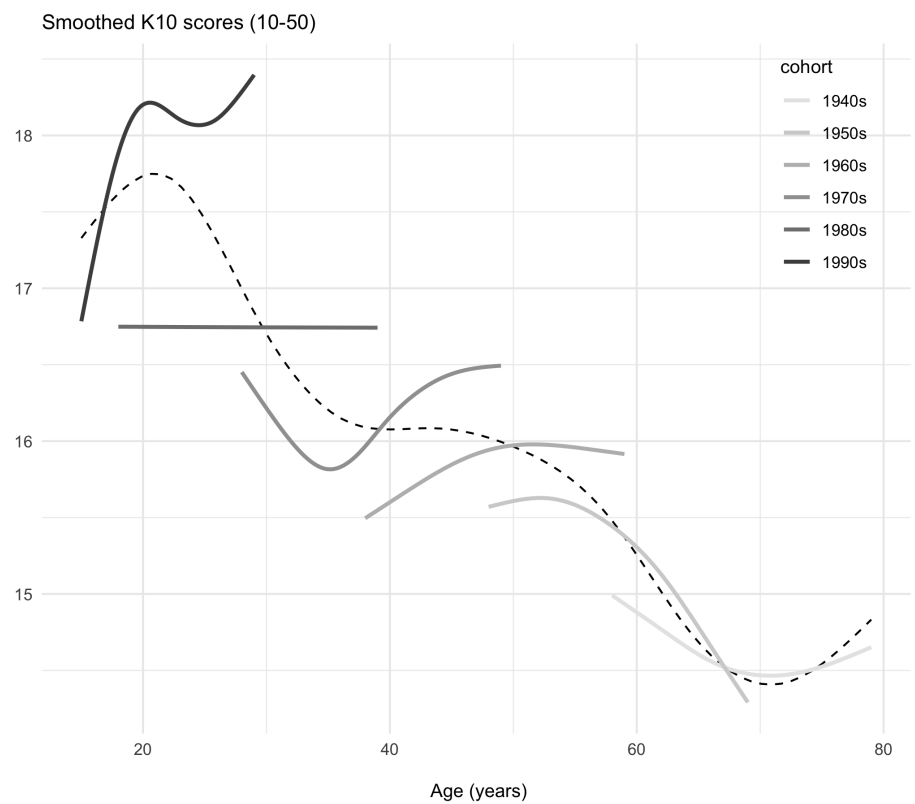

**Fig. S3.** Cohort trajectories in psychological distress (K10 scores). Psychological distress was higher for later cohorts than earlier cohorts at the same age.

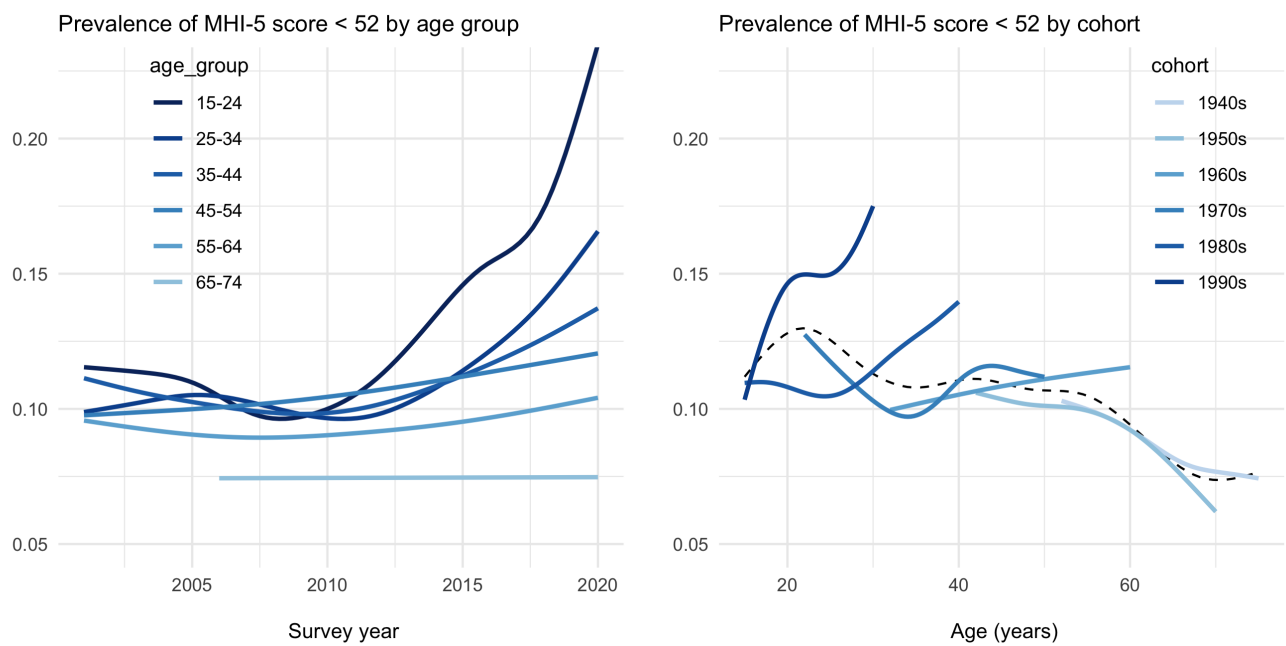

**Fig. S4.** Age and cohort effects on prevalence of mental illness. The prevalence of mental illness varied between age-groups and cohorts in a similar pattern as psychological distress. Prevalence was higher for younger cohorts than older cohorts at the same age.

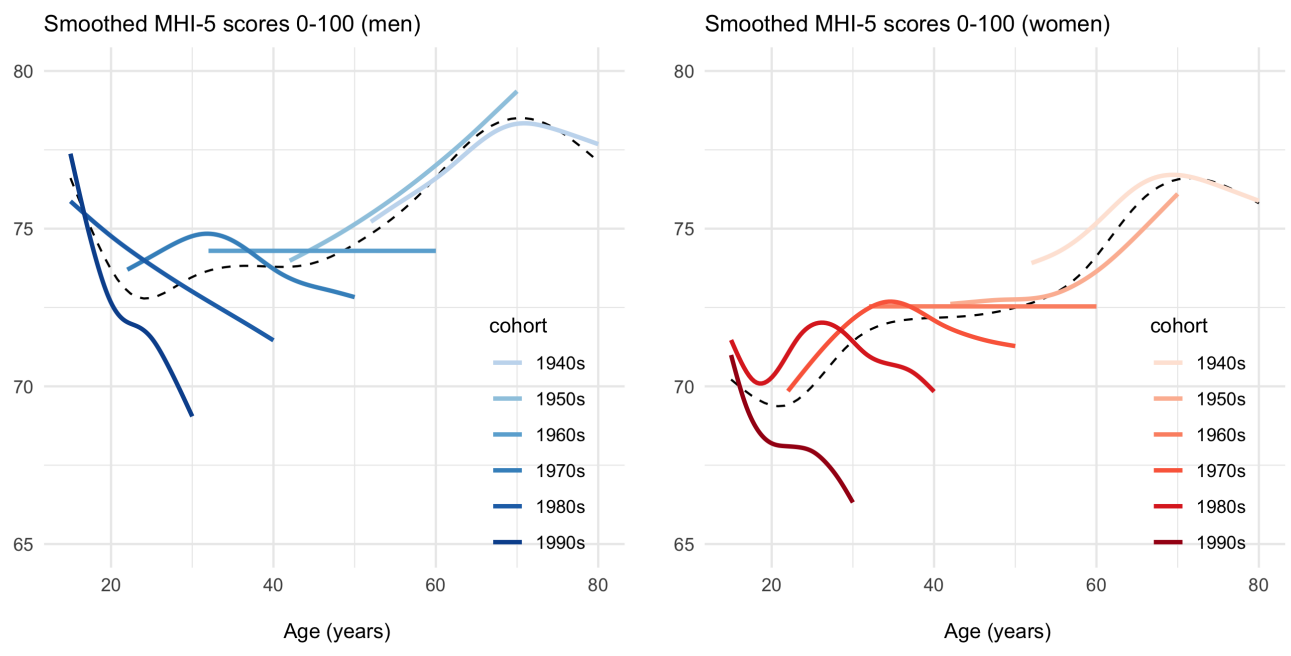

**Fig. S5.** Cohort trajectories in mental health for men (left panel) and women (right panel). Women have lower average MHI-5 scores than men, however men and women have similar trajectory differences between cohorts.



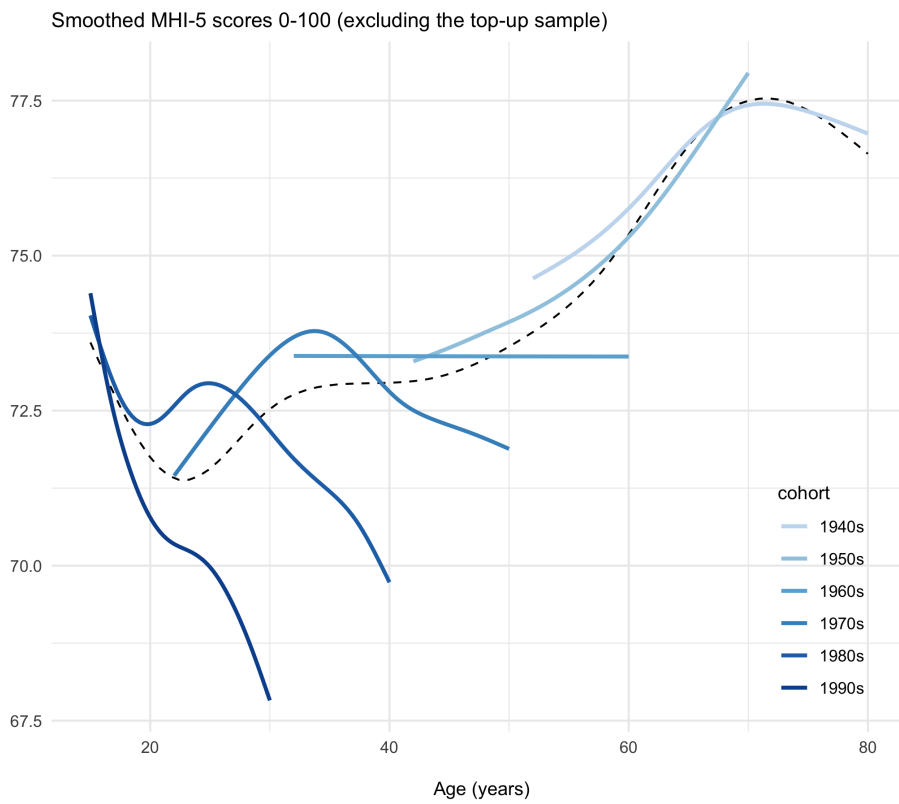

**Fig. S6.** Cohort trajectories in mental health excluding the top-up sample. The addition of new participants in the top-up sample in 2011 did not substantially change the cohort trajectories.

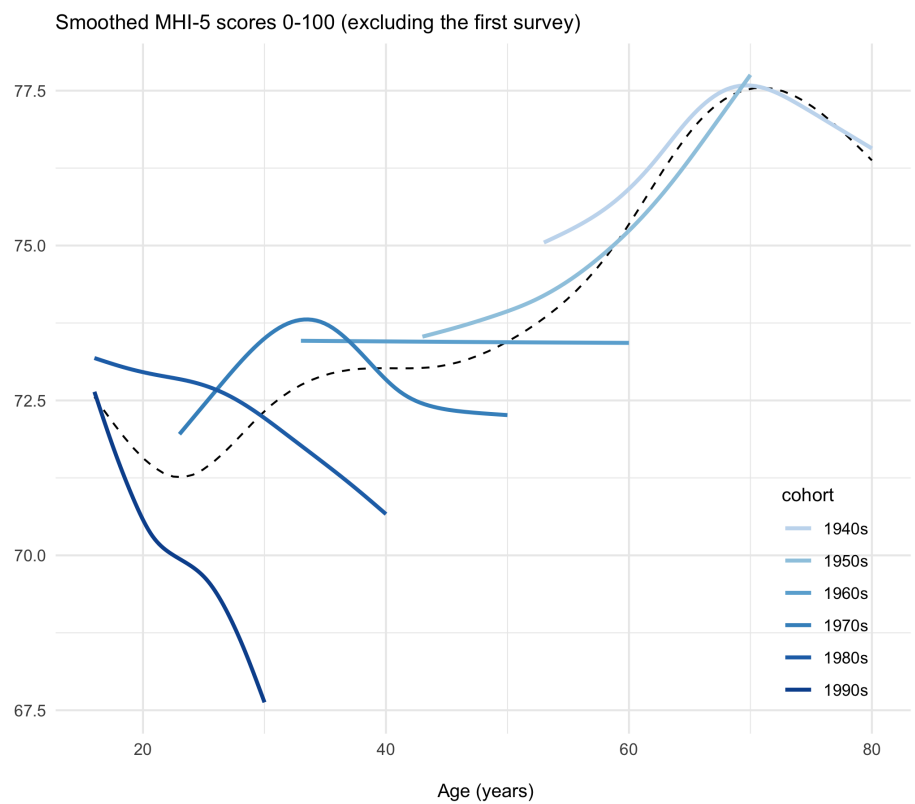

**Fig. S7.** Cohort trajectories in mental health excluding the first survey response. Excluding the first survey response from each person to reduce social demand effects in the results did not substantially change the cohort trajectories.

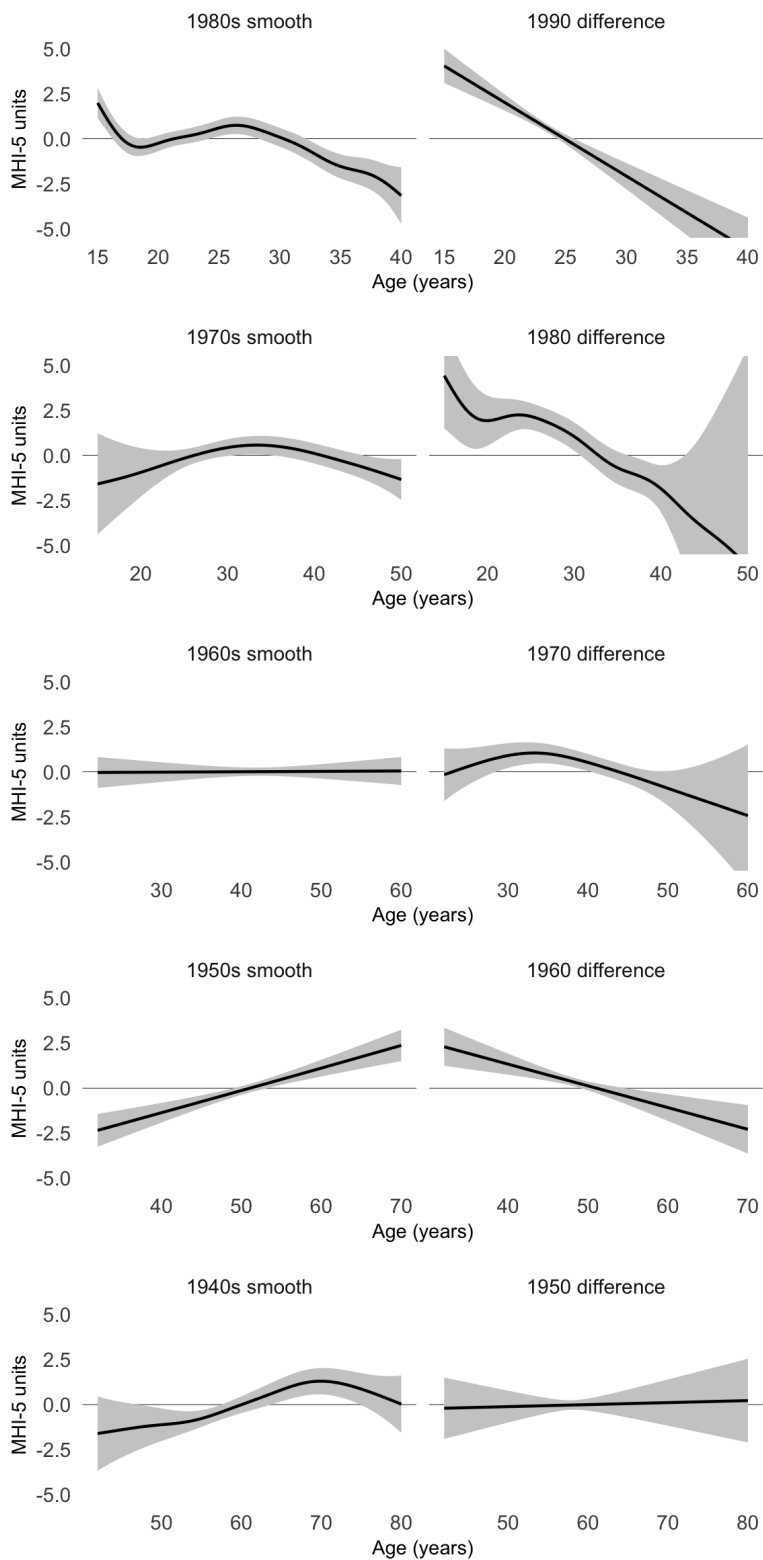

**Fig. S8.** Centered cohort trajectories (left) and their differences to the subsequent cohort (right) after excluding persons who are eventually lost to attrition in the panel. Removing missingness due to attrition did not substantially change the cohort differences

**Table S1. Cohort differences in dependency between missingness and MHI-5 score**

| Cohort | OR    | Difference | SE difference | z ratio | p-value |
|--------|-------|------------|---------------|---------|---------|
| 1940s  | 0.982 | .          | .             | .       | .       |
| 1950s  | 0.984 | 0.002      | 0.003         | 0.671   | 0.9851  |
| 1960s  | 0.993 | 0.009      | 0.002         | 4.272   | 0.0002  |
| 1970s  | 0.995 | 0.002      | 0.002         | 0.795   | 0.9684  |
| 1980s  | 0.994 | 0.0003     | 0.002         | -0.167  | 0.9999  |
| 1990s  | 0.998 | 0.004      | 0.002         | 1.926   | 0.3861  |

121 **SI Dataset S1 (<https://github.com/datarichard/the-kids-are-alright>)**

122 The full dataset used in this report is available by application to the Australian Government Department of Social  
123 Services (DSS) <https://dataverse.ada.edu.au/dataverse/DSSLongitudinalStudies>. Code to generate the main analyses and  
124 Figures 1 and 2, along with software libraries and the model fit objects generated by the main analyses are available at  
125 <https://github.com/datarichard/the-kids-are-alright>.

126 **References**

- 127 1. P Batterham, M Sunderland, T Slade, A Calear, N Carragher, Assessing distress in the community: psychometric  
128 properties and crosswalk comparison of eight measures of psychological distress. *Psychol. medicine* **48**, 1316–1324 (2018).  
129 2. JE Ware Jr, Sf-36 health survey update. *Spine* **25**, 3130–3139 (2000).  
130 3. DM Berwick, et al., Performance of a five-item mental health screening test. *Med. care* **29**, 169–176 (1991).  
131 4. JE Ware, KK Snow, M Kosinski, B Gandek, Sf-36 health survey, (The Health Institute, New England Medical Center,  
132 Boston, MA, USA), Manual and interpretation guide (1993).  
133 5. U Bültmann, et al., Depressive symptoms and the risk of long-term sickness absence: a prospective study among 4747  
134 employees in denmark. *Soc. psychiatry psychiatric epidemiology* **41**, 875–880 (2006).  
135 6. WC Holmes, A short, psychiatric, case-finding measure for hiv seropositive outpatients: performance characteristics of the  
136 5-item mental health subscale of the sf-20 in a male, seropositive sample. *Med. care* **36**, 237–243 (1998).  
137 7. HJ Rumpf, C Meyer, U Hapke, U John, Screening for mental health: validity of the mhi-5 using dsm-iv axis i psychiatric  
138 disorders as gold standard. *Psychiatry research* **105**, 243–253 (2001).  
139 8. BH Strand, OS Dalgard, K Tambs, M Rognerud, Measuring the mental health status of the norwegian population: a  
140 comparison of the instruments scl-25, scl-10, scl-5 and mhi-5 (sf-36). *Nord. journal psychiatry* **57**, 113–118 (2003).  
141 9. SV Thorsen, R Rugulies, PU Hjarsbech, JB Bjorner, The predictive value of mental health for long-term sickness  
142 absence: the major depression inventory (mdi) and the mental health inventory (mhi-5) compared. *BMC medical research*  
143 *methodology* **13**, 1–7 (2013).  
144 10. F Perales Perez, B Baffour, Respondent mental health, mental disorders and survey interview outcomes. *Surv. Res.*  
145 *Methods* **12**, 161–176 (2018).
